# Supplementary material
Source: PubMed Central journal article supplement (PMC4550508)
Supplement: NIHMS701900-supplement-Supplemental_Material.pdf [file NIHMS701900-supplement-Supplemental_Material.pdf]

SUPPLEMENTAL MATERIAL

**Supplemental Table 1: Equivalent population percentiles of LDL-C, non-HDL-C and TC/HDL-C ratio from the Very Large Database of**

**Lipids.** The **bold** and *italic* numbers correspond to LDL-C guideline cut-points.

| VLDL database percentile | LDL-C (mg/dl) | Non-HDL-C (mg/dl) | TC/HDL-C ratio |
|--------------------------|---------------|-------------------|----------------|
| 1 <sup>st</sup>          | 37            | 60                | 1.9            |
| 5 <sup>th</sup>          | 54            | 76                | 2.2            |
| 10 <sup>th</sup>         | 63            | 86                | 2.4            |
| <b>15<sup>th</sup></b>   | <b>70</b>     | <b>93</b>         | <b>2.6</b>     |
| 20 <sup>th</sup>         | 77            | 100               | 2.7            |
| 25 <sup>th</sup>         | 82            | 106               | 2.9            |
| <b>44<sup>th</sup></b>   | <b>100</b>    | <b>125</b>        | <b>3.3</b>     |
| 50 <sup>th</sup>         | 106           | 132               | 3.5            |
| <b>72<sup>nd</sup></b>   | <b>130</b>    | <b>157</b>        | <b>4.2</b>     |
| 75 <sup>th</sup>         | 134           | 161               | 4.3            |
| <b>90<sup>th</sup></b>   | <b>160</b>    | <b>190</b>        | <b>5.2</b>     |
| 95 <sup>th</sup>         | 177           | 209               | 5.9            |
| 99 <sup>th</sup>         | 215           | 251               | 7.2            |

**Supplemental Table 2: Patient-level percentile discordance between TC/HDL-C compared to direct LDL-C and LDL-C estimated by the novel method<sup>2</sup> across triglyceride categories.**

|                                                                          | Triglyceride categories (mg/dl) |                        |                        |                        |                        |
|--------------------------------------------------------------------------|---------------------------------|------------------------|------------------------|------------------------|------------------------|
|                                                                          | <100<br>N = 520,879             | 100-149<br>N = 398,170 | 150-199<br>N = 204,144 | 200-399<br>N = 187,239 | Total<br>N = 1,310,432 |
| <b>A) TC/HDL-C and direct LDL-C percentile discordance</b>               |                                 |                        |                        |                        |                        |
| <b>TC/HDL-C percentile minus<br/>LDL-C percentile<br/>median (Q1-Q3)</b> | -9.74 (-26.4, 2.9)              | 0.64 (-13.8, 15.6)     | 8.38 (-4.3, 24.7)      | 17.26 (2.5, 35.9)      | -0.11 (-15.8, 15.6)    |
| <b>≥10 percentile units discordance</b>                                  |                                 |                        |                        |                        |                        |
| TC/HDL-C < LDL-C, n (%)                                                  | 258,049 (49.5)                  | 121,405 (30.5)         | 34,341 (16.8)          | 13,322 (7.1)           | 427,117 (32.6)         |
| Concordant, n (%)                                                        | 183,141 (35.2)                  | 144,116 (36.2)         | 73,488 (36.0)          | 58,602 (31.3)          | 459,347 (35.1)         |
| TC/HDL-C > LDL-C, n (%)                                                  | 79,689 (15.3)                   | 132,649 (33.3)         | 96,315 (47.2)          | 115,315 (61.6)         | 423,968 (32.3)         |
| <b>≥25 percentile units discordance</b>                                  |                                 |                        |                        |                        |                        |
| TC/HDL-C < LDL-C, n (%)                                                  | 139,502 (26.8)                  | 50,924 (12.8)          | 11,195 (5.5)           | 3,484 (1.8)            | 205,105 (15.7)         |
| Concordant, n (%)                                                        | 357,582 (68.6)                  | 290,501 (73.0)         | 142,580 (69.8)         | 111,186 (59.4)         | 901,849 (68.8)         |
| TC/HDL-C > LDL-C, n (%)                                                  | 23,795 (4.6)                    | 56,745 (14.2)          | 50,369 (24.7)          | 72,569 (38.8)          | 203,478 (15.5)         |
| <b>B) TC/HDL-C and LDL-C by novel method percentile discordance</b>      |                                 |                        |                        |                        |                        |
| <b>TC/HDL-C percentile minus<br/>LDL-C percentile<br/>median (Q1-Q3)</b> | -9.59 (-26.1, 2.9)              | 0.65 (-13.5, 15.3)     | 8.26 (-4.0, 24.1)      | 16.95 (2.8, 34.9)      | -0.03 (-15.5, 15.3)    |
| <b>≥10 percentile units discordance</b>                                  |                                 |                        |                        |                        |                        |
| TC/HDL-C < LDL-C, n (%)                                                  | 256,661 (49.3)                  | 120,048 (30.1)         | 33,215 (16.3)          | 12,002 (6.4)           | 421,926 (32.2)         |
| Concordant, n (%)                                                        | 185,394 (35.6)                  | 146,797 (36.9)         | 75,264 (36.9)          | 59,831 (32.0)          | 467,286 (35.7)         |
| TC/HDL-C > LDL-C, n (%)                                                  | 78,824 (15.1)                   | 131,325 (33.0)         | 95,665 (46.8)          | 115,406 (61.6)         | 421,220 (32.1)         |
| <b>≥25 percentile units discordance</b>                                  |                                 |                        |                        |                        |                        |
| TC/HDL-C < LDL-C, n (%)                                                  | 137,210 (26.3)                  | 49,028 (12.3)          | 10,236 (5.0)           | 2,886 (1.5)            | 199,360 (15.2)         |
| Concordant, n (%)                                                        | 360,443 (69.2)                  | 294,159 (73.9)         | 145,324 (71.2)         | 113,185 (60.5)         | 913,111 (69.7)         |
| TC/HDL-C > LDL-C, n (%)                                                  | 23,226 (4.5)                    | 54,983 (13.8)          | 48,584 (23.8)          | 71,168 (38.0)          | 197,961 (15.1)         |

**Supplemental Table 3A: Multivariable linear regression analysis to predict percentile discordance between TC/HDL-C versus LDL-C.**

|                          | TC/HDL-C vs. LDL-C percentile discordance |                         |                         |                         |                         |                         |
|--------------------------|-------------------------------------------|-------------------------|-------------------------|-------------------------|-------------------------|-------------------------|
|                          | A                                         | B                       | C                       | D                       | E                       | F                       |
| <b>Constant</b>          | -7.66 (0.03); -301.07                     | -3.83 (0.02); -234.36   | -0.91 (0.01); -76.48    | -0.70 (0.01); -59.54    | -1.75 (0.01); -128.33   | -1.58 (0.01); -135.08   |
| <b>ln(TG)</b>            | 16.07 (0.02); 787.95                      | 20.03 (0.01); 1513.74   | 12.46 (0.01); 1086.47   | 12.31 (0.01); 1077.42   | 15.30 (0.01); 1235.91   | 12.26 (0.01); 1059.61   |
| <b>Age</b>               | 0.17 (0.02); 9.01                         | -1.76 (0.01); -150.99   | -0.32 (0.01); -38.23    | -0.30 (0.01); -36.06    | -0.43 (0.01); -44.37    | -0.67 (0.01); -80.60    |
| <b>Gender (male)</b>     | 16.41 (0.04); 446.19                      | 8.38 (0.02); 349.42     | 2.03 (0.02); 113.89     | 1.62 (0.02); 89.89      | 3.44 (0.02); 166.86     | 2.75 (0.02); 155.50     |
| <b>HDL-C</b>             |                                           |                         | -13.24 (0.01); -1140.88 | -12.99 (0.01); -1114.59 |                         |                         |
| <b>HDL<sub>2</sub>-C</b> |                                           |                         |                         |                         | -9.68 (0.01); -794.73   |                         |
| <b>HDL<sub>3</sub>-C</b> |                                           |                         |                         |                         |                         | -13.17 (0.01); -1140.68 |
| <b>TC</b>                |                                           | -17.27 (0.01); -1393.68 | -11.52 (0.01); -1142.03 | -11.32 (0.01); -1116.92 | -13.78 (0.01); -1244.73 | -11.29 (0.01); -1104.96 |
| <b>LLDR</b>              |                                           |                         |                         | 1.22 (0.01); 134.93     |                         |                         |
| <b>R<sup>2</sup></b>     | 0.4025                                    | 0.7601                  | 0.8801                  | 0.8821                  | 0.8384                  | 0.8800                  |

\* Natural log of triglycerides due to log normal distribution of triglycerides

Results shown are: coefficient (Standard Error); T statistic

All covariates, except gender, were standardized.

All values are statistically significant (p<0.0001)

TG = triglycerides; HDL-C = high-density lipoprotein cholesterol; TC = total cholesterol; LDL-C = low-density lipoprotein cholesterol; LLDR = logarithmic LDL density ratio

**Supplemental Table 3B: Multivariable linear regression analysis to predict percentile discordance between TC/HDL-C versus non-HDL-**

**C.**

|                          | TC/HDL-C vs. non-HDL-C percentile discordance |                         |                         |                         |                         |                         |
|--------------------------|-----------------------------------------------|-------------------------|-------------------------|-------------------------|-------------------------|-------------------------|
|                          | A                                             | B                       | C                       | D                       | E                       | F                       |
| <b>Constant</b>          | -7.32 (0.02); -312.3                          | -3.96 (0.02); -246.56   | -0.78 (0.01); -76.11    | -0.62 (0.01); -60.81    | -1.67 (0.01); -132.83   | -1.54 (0.01); -149.57   |
| <b>ln(TG)</b>            | 6.39 (0.02); 339.97                           | 9.87 (0.01); 759.52     | 1.64 (0.01); 165.56     | 1.52 (0.01); 153.70     | 4.65 (0.01); 409.53     | 1.51 (0.01); 148.78     |
| <b>Age</b>               | -0.04 (0.02); -2.09                           | -1.73 (0.01); -150.83   | -0.16 (0.01); -22.27    | -0.14 (0.01); -20.12    | -0.26 (0.01); -29.08    | -0.55 (0.01); -75.80    |
| <b>Gender (male)</b>     | 15.65 (0.03); 461.78                          | 8.60 (0.02); 364.92     | 1.70 (0.02); 110.00     | 1.38 (0.02); 88.66      | 3.15 (0.02); 166.15     | 2.54 (0.02); 163.28     |
| <b>HDL-C</b>             |                                               |                         | -14.39 (0.01); -1434.58 | -14.21 (0.01); -1406.97 |                         |                         |
| <b>HDL<sub>2</sub>-C</b> |                                               |                         |                         |                         | -10.70 (0.01); -956.86  |                         |
| <b>HDL<sub>3</sub>-C</b> |                                               |                         |                         |                         |                         | -14.18 (0.01); -1398.02 |
| <b>TC</b>                |                                               | -15.18 (0.01); -1247.17 | -8.94 (0.01); -1022.61  | -8.79 (0.01); -1000.83  | -11.33 (0.01); -1115.53 | -8.74 (0.01); -974.26   |
| <b>LLDR</b>              |                                               |                         |                         | 0.94 (0.01); 119.08     |                         |                         |
| <b>R<sup>2</sup></b>     | 0.2138                                        | 0.6417                  | 0.8611                  | 0.8631                  | 0.7896                  | 0.8567                  |

\* Natural log of triglycerides due to log normal distribution of triglycerides

Results shown are: coefficient (Standard Error); T statistic

All covariates, except gender, were standardized.

All values are statistically significant (p<0.0001)

TG = triglycerides; HDL-C = high-density lipoprotein cholesterol; TC = total cholesterol; LDL-C = low-density lipoprotein cholesterol; LLDR = logarithmic LDL density ratio

Supplemental Figure 1: Lipid distributions in *VLDL* and NHANES. Kernel density plots of multiple lipid parameters in the Very Large Database of Lipids (*VLDL*) 2009-2011 and the National Health and Nutrition Examination Survey (NHANES) 2007 to 2008.<sup>1</sup>

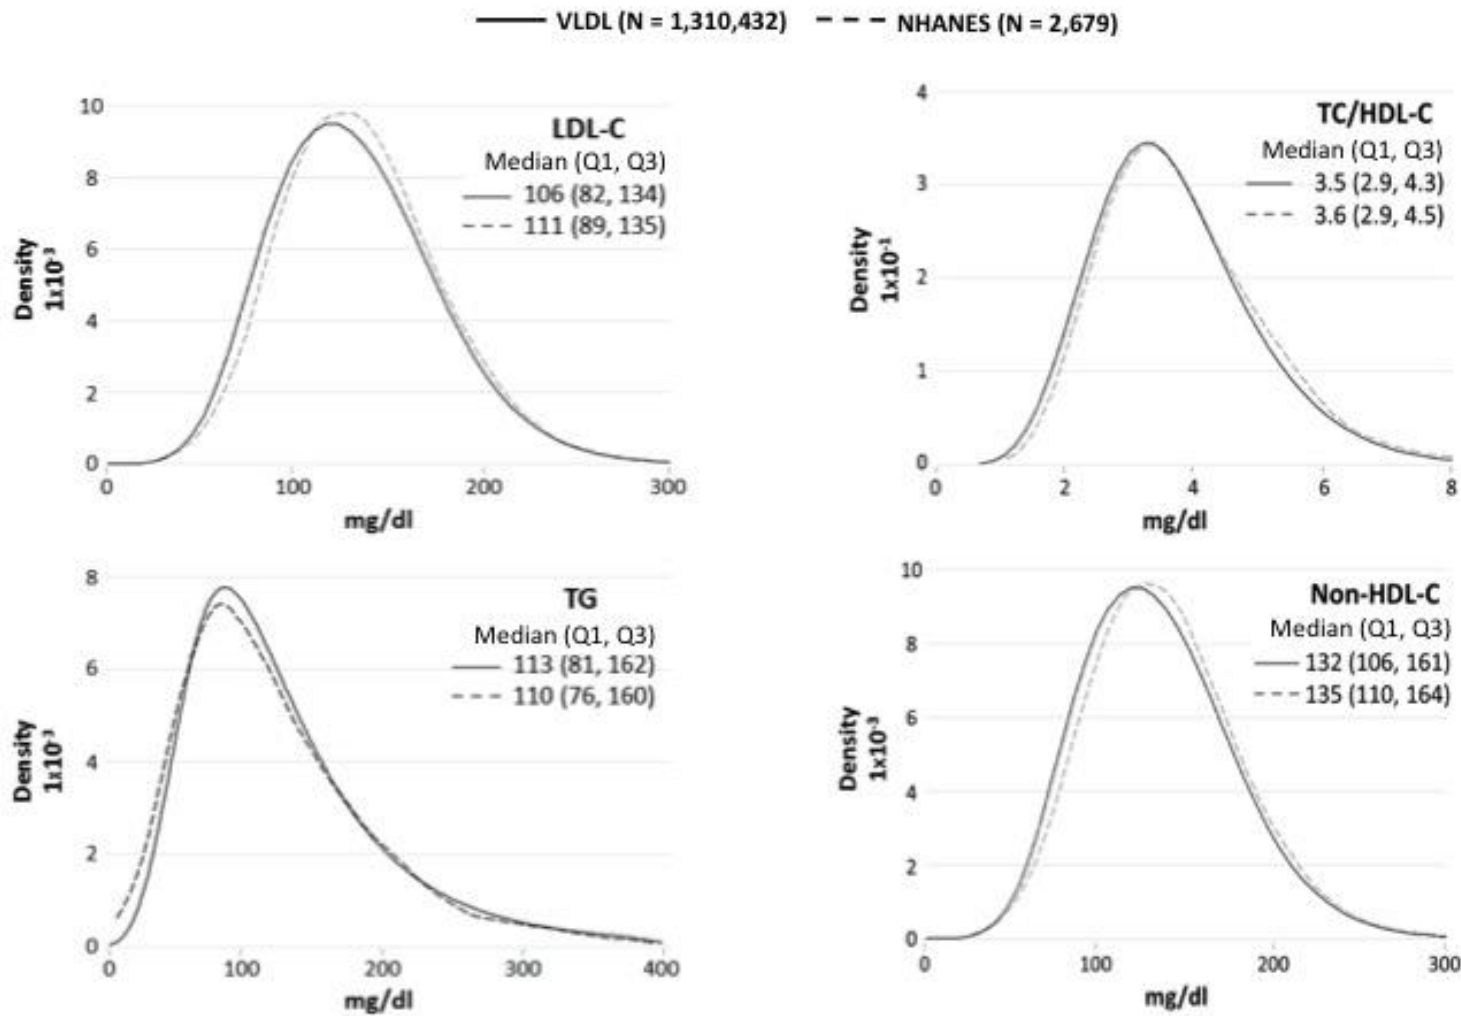

**Supplemental Figure 2: Proportions with direct or novel LDL-C <12<sup>th</sup> population percentile but discordantly high TC/HDL-C.**

**A)** Proportion of patients with direct LDL-C <70 mg/dL and TC/HDL-C  $\geq 2.5$  (12<sup>th</sup> percentile equivalent cutpoints) across various triglyceride categories; **B)** proportion of patients with novel method LDL-C <70 mg/dL and TC/HDL-C  $\geq 2.5$  (12<sup>th</sup> percentile equivalent cutpoints) across various triglyceride categories. TC/HDL-C (Total Cholesterol to HDL-C ratio); LDL-C (Low-density Lipoprotein Cholesterol); non-HDL-C (Non-High-density Lipoprotein Cholesterol)

**A) TC/HDL-C percentile discordance in patients with novel method LDL-C < 70 mg/dL (12<sup>th</sup> percentile)**

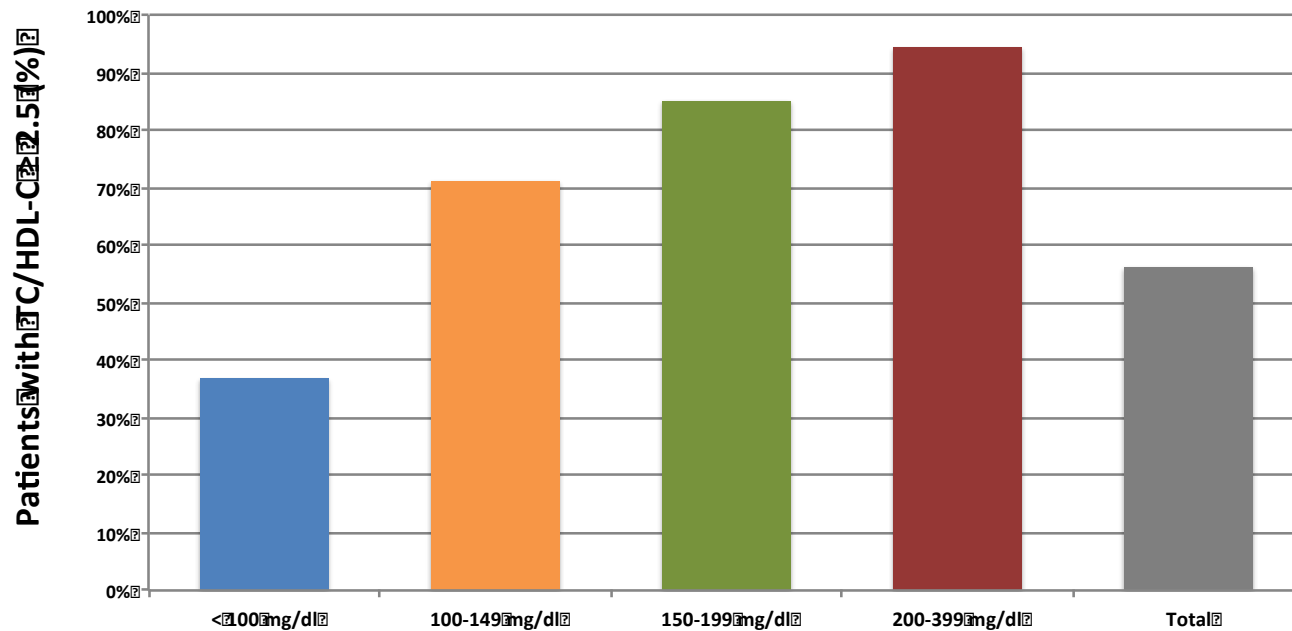

| Triglyceride Category   | <100 mg/dL<br>N=2,631 | 100-149 mg/dL<br>N=4,740 | 150-199 mg/dL<br>N=16,170 | 200-399 mg/dL<br>N=13,376 | Total<br>N=153,917 |
|-------------------------|-----------------------|--------------------------|---------------------------|---------------------------|--------------------|
| TC/HDL-C $\geq 2.5$ , N | 30,458                | 29,667                   | 13,763                    | 12,637                    | 86,525             |
| %                       | 36.9%                 | 71.1%                    | 85.1%                     | 94.5%                     | 56.2%              |

B)

**TC/HDL-C percentile discordance in patients with direct LDL-C < 70 mg/dL (12<sup>th</sup> percentile)**

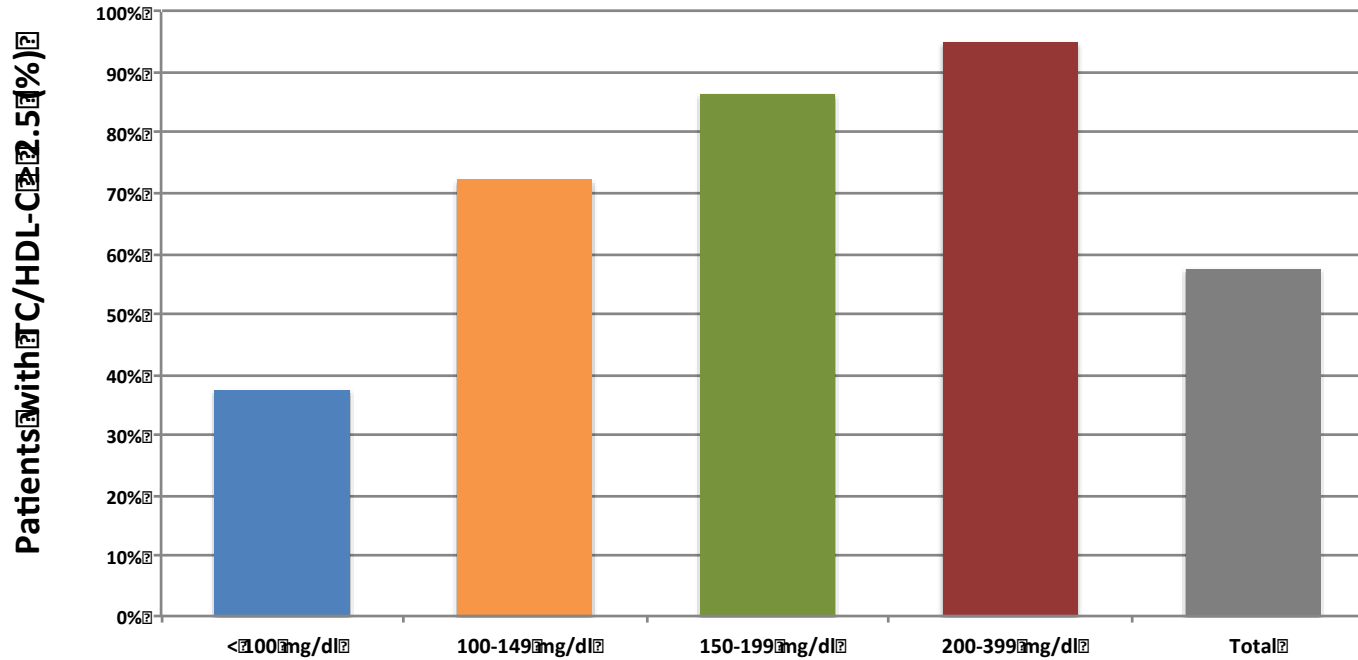

| Triglyceride category | < 100 mg/dL<br>N = 1,727 | 100-149 mg/dL<br>N = 2,058 | 150-199 mg/dL<br>N = 1,215 | 200-399 mg/dL<br>N = 1,325 | Total<br>N = 15,725 |
|-----------------------|--------------------------|----------------------------|----------------------------|----------------------------|---------------------|
| TC/HDL-C ≥ 2.5, N     | 30582                    | 30355                      | 14870                      | 13039                      | 88846               |
| %                     | 37.4%                    | 72.2%                      | 86.4%                      | 95.0%                      | 57.4%               |



## **References:**

1. Kuklina EV. Trends in High Levels of Low-Density Lipoprotein Cholesterol in the United States, 1999-2006. *JAMA*. 2009;302:2104.
2. Martin SS, Blaha MJ, Elshazly MB, Toth PP, Kwiterovich PO, Blumenthal RS, Jones SR. Comparison of a novel method vs the Friedewald equation for estimating low-density lipoprotein cholesterol levels from the standard lipid profile. *JAMA*. 2013;310:2061–2068.
